# Supplementary material for: A global scale evaluation of extreme events in the eartH2Observe project
Source: Copernicus journal article supplement (doi:10.5194/hess-2018-622), 2019-01-09
Supplement: Supplementary file 1 [file hess-2018-622-supplement.pdf]

1  
2  
3 **Supplementary information**  
4

5 *Data and code availability*  
6

7 All simulation data have been made publicly-available through a Water Cycle Integrator portal (WCI) at  
8 <https://wci.earth2observe.eu/>. Requests for further data are very welcome and may be addressed to the  
9 corresponding author.

10 Global maps were calculated for sections of the globe using a custom script written in Python  
11 v.2.7.5 and then knitted together using NetCDF Operators (NCO) Tools (Zender, 2008) called from a  
12 custom script written in R v.3.5.1 (R Core Team, 2018) (scripts are available on request from the  
13 corresponding author). Visualisations were created using Panoply v.4.4.1 and R v.3.5.1 (R Core Team,  
14 2018).  
15

16  
17 *Uncertainty maps*  
18

19 Absolute uncertainty numbers may not be comparable between this study and other simulations, but our  
20 results give a first estimate of the relative uncertainties of predictions from particular models and  
21 precipitation products of evapotranspiration highs (Fig. S1), evapotranspiration lows (Fig. S2), runoff highs  
22 (Fig. S3) and runoff lows (Fig. S4).  
23

a. Model uncertainty in ET highs: using MSWEP

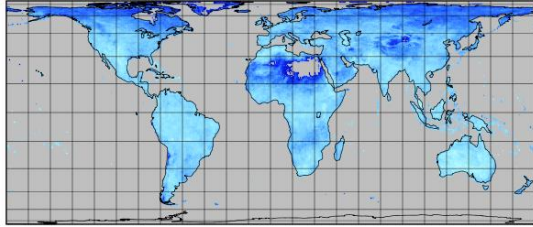

f. Data uncertainty in ET highs using JULES

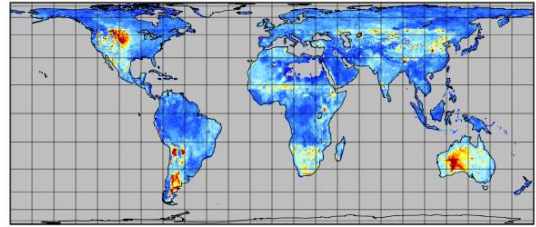

b. Difference map (model uncertainty using CMORPH) - (using MSWEP)

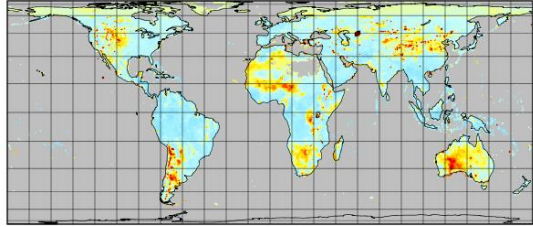

g. Difference map (data uncertainty using H-TESESEL) - (using JULES)

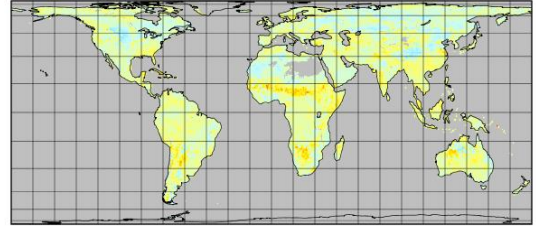

c. Difference map (model uncertainty using GSMAP) - (using MSWEP)

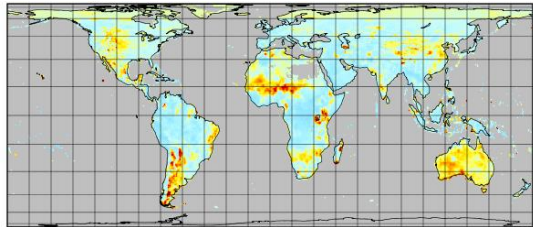

h. Difference map (data uncertainty using ORCHIDEE) - (using JULES)

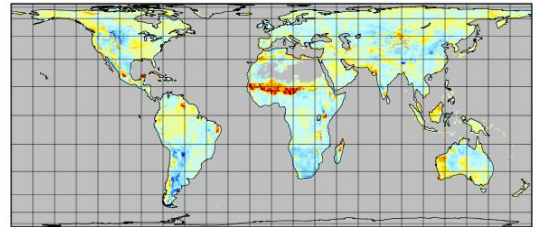

d. Difference map (model uncertainty using TRMM) - (using MSWEP)

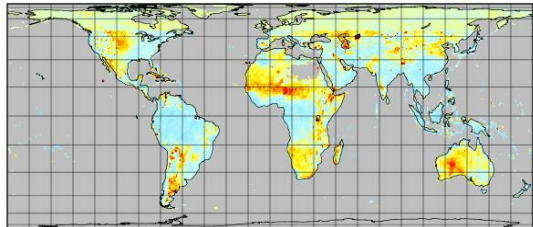

i. Difference map (data uncertainty using SURFEX) - (using JULES)

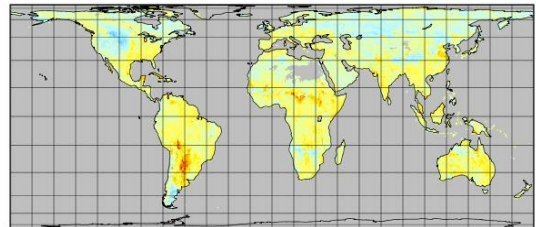

e. Difference map (model uncertainty using TRMMRT) - (using MSWEP)

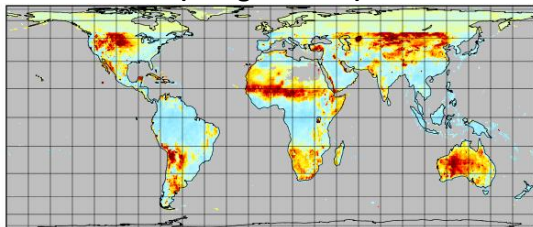

j. Difference map (data uncertainty using WaterGAP3) - (using JULES)

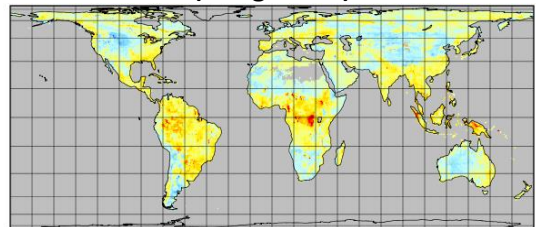

**Fig. S1:** Evapotranspiration (ET) highs. Note the differing scales: plots in top row scale ranges 0.0-4.0 extreme events per year (EE/yr) while the remaining rows ranging -4.0 to 4.0 EE/yr.

a. Model uncertainty in ET lows using MSWEP

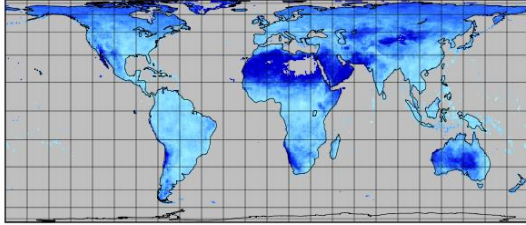

f. Data uncertainty in ET lows using JULES

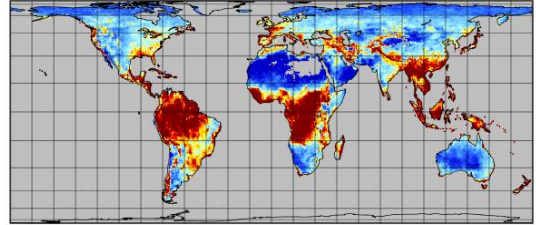

b. Difference map (model uncertainty using CMORPH) - (using MSWEP)

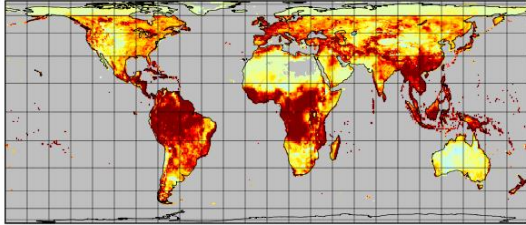

g. Difference map (data uncertainty using H-TESESEL) - (using JULES)

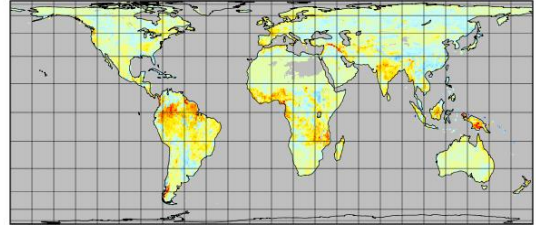

c. Difference map (model uncertainty using GSMAP) - (using MSWEP)

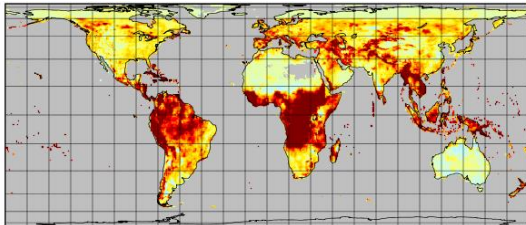

h. Difference map (data uncertainty using ORCHIDEE) - (using JULES)

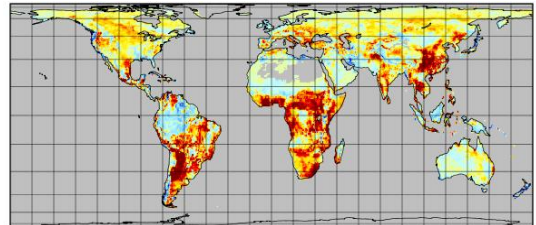

d. Difference map (model uncertainty using TRMM) - (using MSWEP)

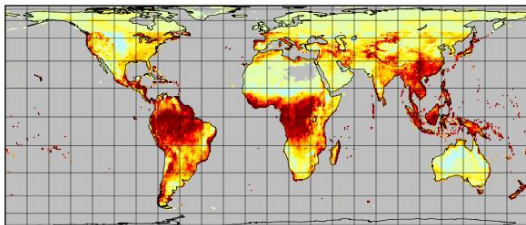

i. Difference map (data uncertainty using SURFEX) - (using JULES)

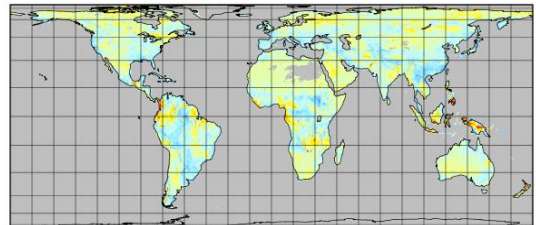

e. Difference map (model uncertainty using TRMMRT) - (using MSWEP)

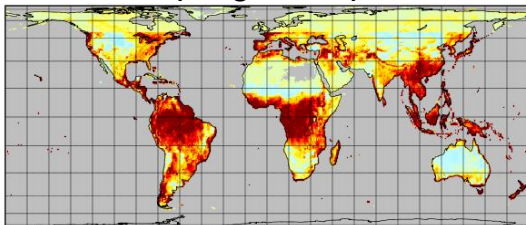

j. Difference map (data uncertainty using WaterGAP3) - (using JULES)

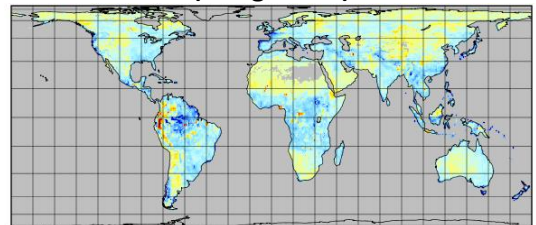

**Fig. S2:** Evapotranspiration (ET) lows. Note the differing scales: plots in top row scale ranges 0.0-4.0 extreme events per year (EE/yr) while the remaining rows ranging -4.0 to 4.0 EE/yr.

a. Model uncertainty in RUNOFF highs: using MSWEP

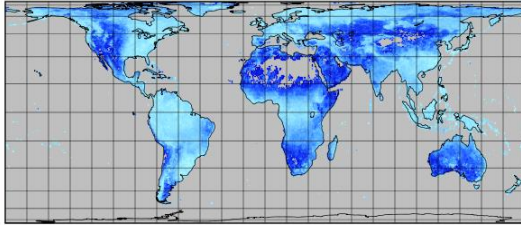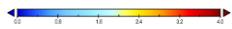

f. Data uncertainty in RUNOFF highs using JULES

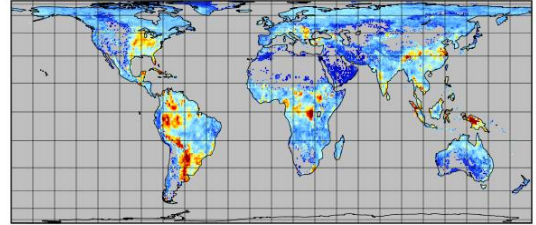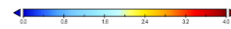

b. Difference map (model uncertainty using CMORPH) - (using MSWEP)

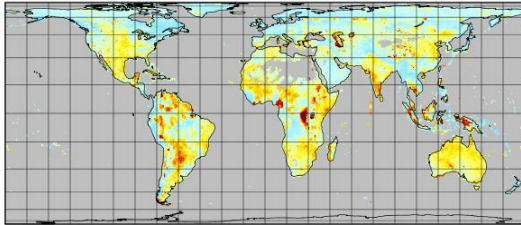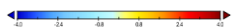

g. Difference map (data uncertainty using H-TESESEL) - (using JULES)

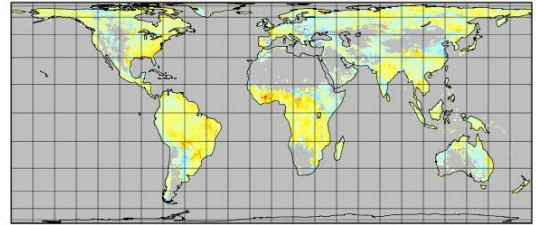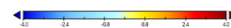

c. Difference map (model uncertainty using GSMAP) - (using MSWEP)

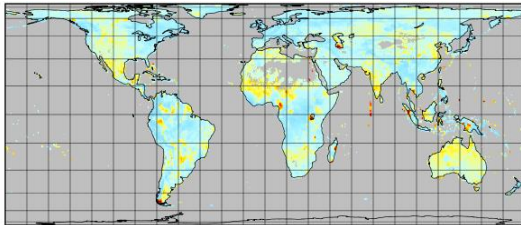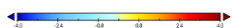

h. Difference map (data uncertainty using ORCHIDEE) - (using JULES)

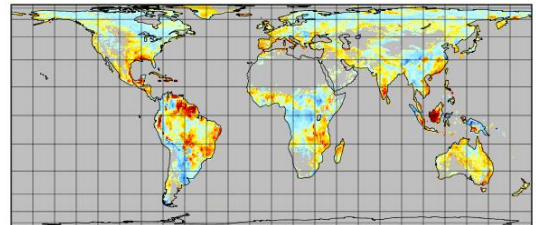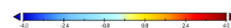

d. Difference map (model uncertainty using TRMM) - (using MSWEP)

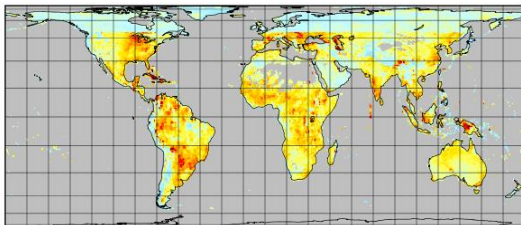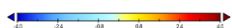

i. Difference map (data uncertainty using SURFEX) - (using JULES)

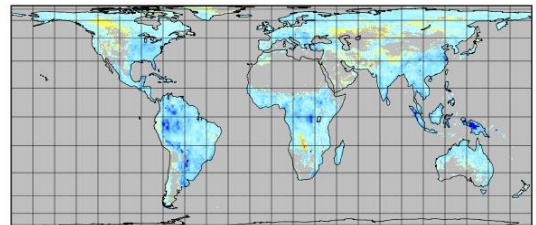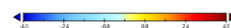

e. Difference map (model uncertainty using TRMMRT) - (using MSWEP)

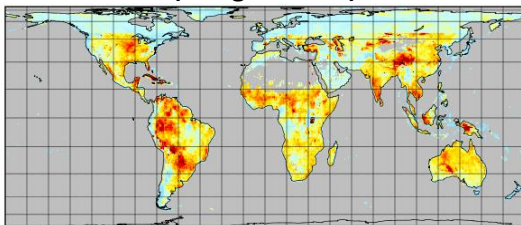

j. Difference map (data uncertainty using WaterGAP3) - (using JULES)

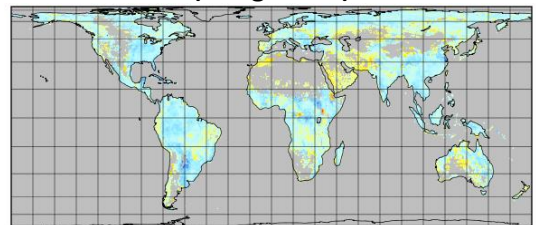

**Fig. S3:** Runoff highs. Note the differing scales: plots in top row scale ranges 0.0-4.0 extreme events per year (EE/yr) while the remaining rows ranging -4.0 to 4.0 EE/yr.

30  
31  
32

a. Model uncertainty in RUNOFF lows using MSWEP

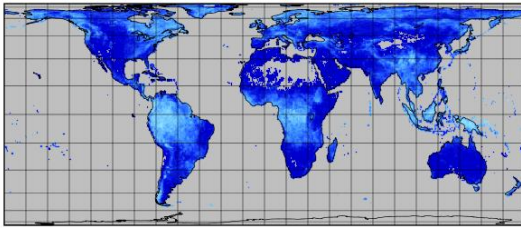

f. Data uncertainty in RUNOFF lows using JULES

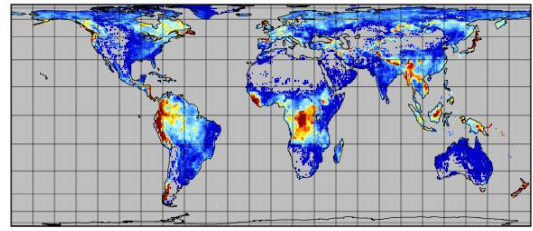

b. Difference map (model uncertainty using CMORPH) - (using MSWEP)

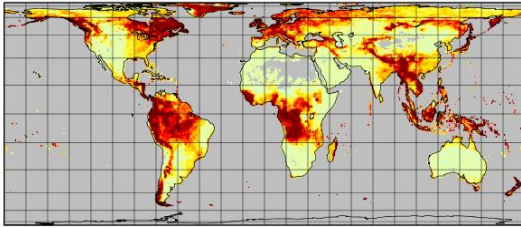

g. Difference map (data uncertainty using H-TESESEL) - (using JULES)

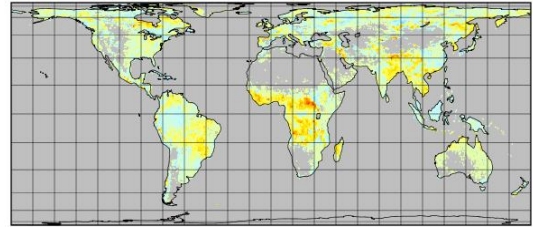

c. Difference map (model uncertainty using GSMAP) - (using MSWEP)

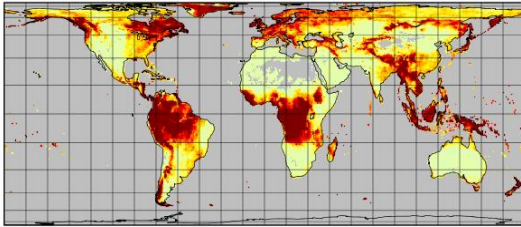

h. Difference map (data uncertainty using ORCHIDEE) - (using JULES)

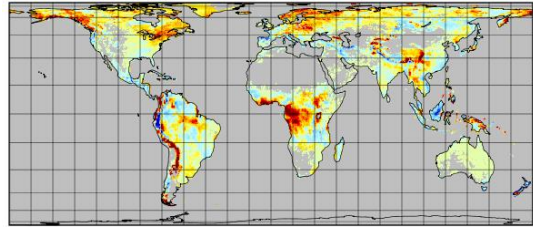

d. Difference map (model uncertainty using TRMM) - (using MSWEP)

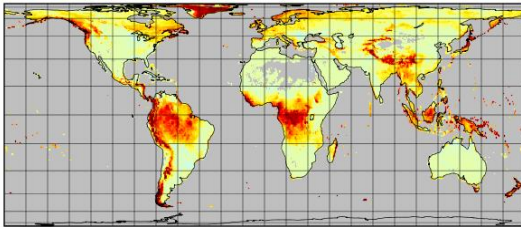

i. Difference map (data uncertainty using SURFEX) - (using JULES)

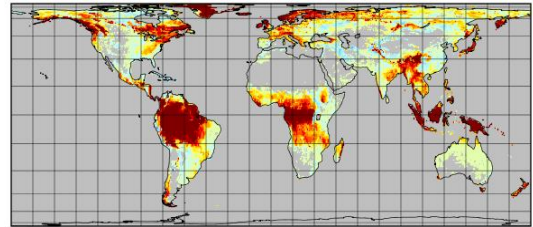

e. Difference map (model uncertainty using TRMMRT) - (using MSWEP)

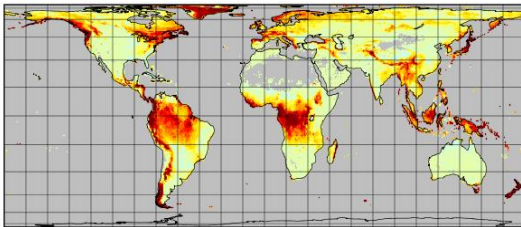

j. Difference map (data uncertainty using WaterGAP3) - (using JULES)

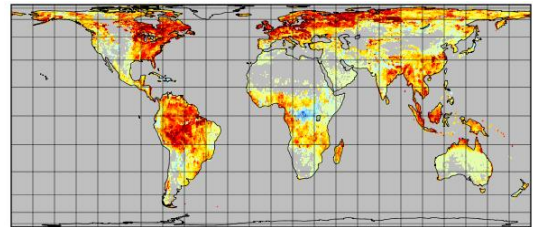

**Fig. S4:** Runoff lows. Note the differing scales: plots in top row scale ranges 0.0-4.0 extreme events per year (EE/yr) while the remaining rows ranging -4.0 to 4.0 EE/yr.
